# Supplementary material for: Discovery of mitochondrion-targeting copper(ii)-plumbagin and -bipyridine complexes as chemodynamic therapy agents with enhanced antitumor activity
Source: Royal Society of Chemistry journal article supplement (doi:10.1039/d3dt03806h), 2024-01-01
Supplement: d3dt03806h1.pdf [file d3dt03806h1.pdf]

## Supporting Information

### **Discovery of copper(II) complexes with plumbagin and bipyridine as chemodynamic therapy agents with enhanced antitumor activity by targeting mitochondria**

Hai-Qun Zhang <sup>a</sup>, Xing Lu <sup>b</sup>, Jiang-Lun Wu <sup>a</sup>, Mei-Quan Ou <sup>a</sup>, Nan-Feng Chen <sup>a</sup>, Hong Liang, <sup>a,\*</sup> and Zhen-Feng Chen <sup>a,\*</sup>

<sup>1</sup>State Key Laboratory for Chemistry and Molecular Engineering of Medicinal Resources, School of Chemistry and Pharmacy, Guangxi Normal University, Guilin 541004, P. R. China

\*Corresponding authors:

Professor Hong Liang, Professor Zhen-Feng Chen

State Key Laboratory for Chemistry and Molecular Engineering of Medicinal Resources, School of Chemistry and Pharmacy, Guangxi Normal University, 15 Yu Cai Road, Guilin 541004, P. R. China. Fax, 086-773-2120958

E-mail: hliang@gxnu.edu.cn (H. Liang); chenzf@gxnu.edu.cn (Z.-F. Chen)

## Table of Contents

|                                                                                                                                |               |
|--------------------------------------------------------------------------------------------------------------------------------|---------------|
| HRMS spectrum of <b>Cu1–Cu4</b> .....                                                                                          | Pages S3-S4   |
| LC-MS spectrum of <b>Cu1–Cu4</b> .....                                                                                         | Pages S5-S6   |
| IR spectrum of <b>Cu1–Cu4</b> .....                                                                                            | Pages S7-S8   |
| UV-Vis absorption spectra of <b>Cu1–Cu4</b> .....                                                                              | Pages S8      |
| HPLC spectra of <b>Cu1–Cu4</b> .....                                                                                           | Pages S9-S10  |
| Solution behavior of <b>Cu1–Cu4</b> .....                                                                                      | Pages S10-S12 |
| Crystal data and structure refinement for <b>Cu1–Cu4</b> .....                                                                 | Pages S12-S15 |
| The HRMS spectra of <b>Cu1–Cu4</b> reacted with GSH.....                                                                       | Pages S16-S17 |
| Intracellular GSH / GSSG ratio .....                                                                                           | Pages S17     |
| Cell cycle arrest of <b>Cu1–Cu4</b> .....                                                                                      | Pages S18     |
| Expression of apoptosis-related proteins induced by <b>Cu1–Cu4</b> .....                                                       | Pages S18     |
| Pharmacokinetic evaluation in mice: concentration-time profile of <b>Cu2</b> in plasma following a single dose (20 mg/kg)..... | Pages S19     |
| Acute toxicity of <b>Cu2</b> (alive/total) .....                                                                               | Pages S19     |

## 1. The characterization of Cu1–Cu4

P1\_220726104258 #1 RT: 0.01 AV: 1 NL: 7.15E7  
T: FTMS + p ESI Full ms [220.00-800.00]

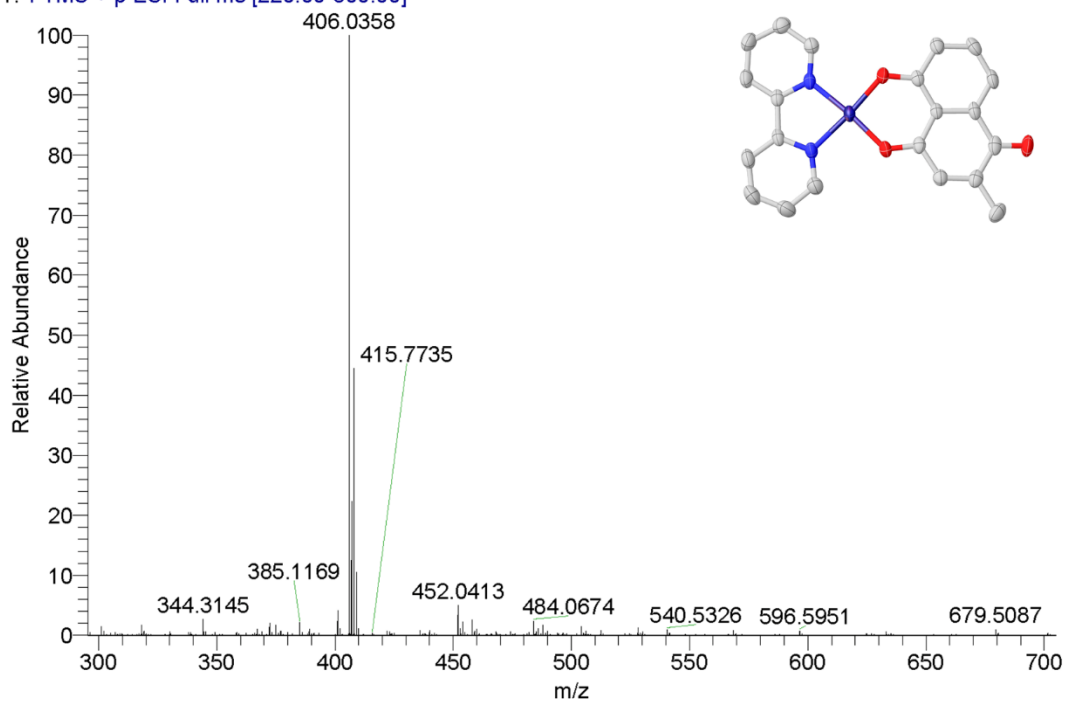

Figure S1. HRMS spectrum of Cu1.

P2\_220726105159 #1 RT: 0.01 AV: 1 NL: 6.03E8  
T: FTMS + p ESI Full ms [220.00-800.00]

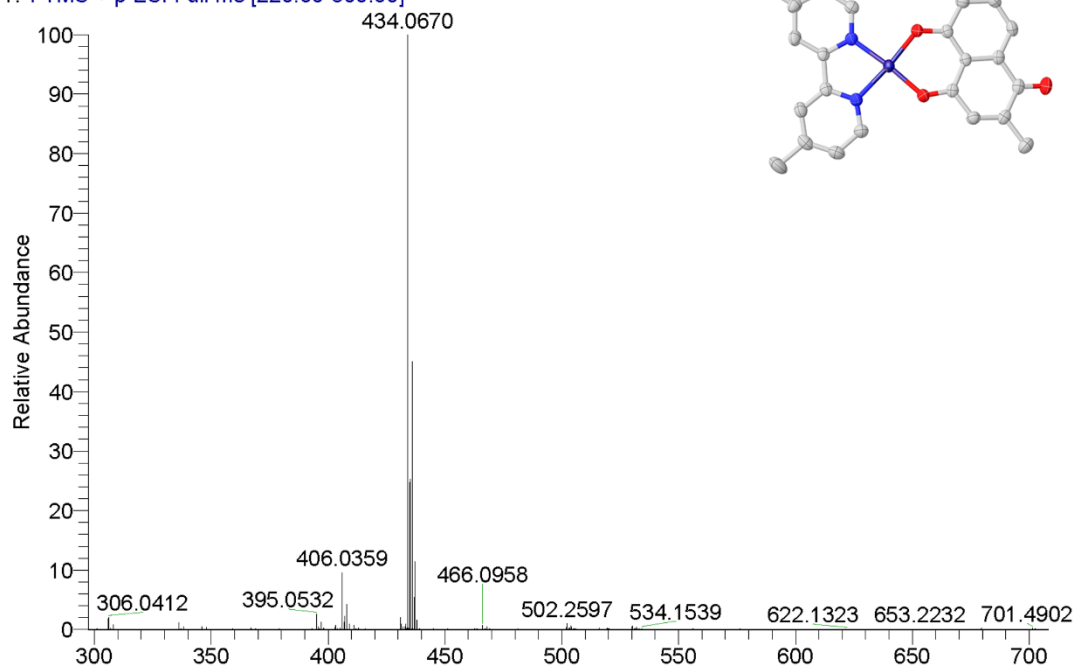

Figure S2. HRMS spectrum of Cu2.

F2\_220726112230 #1 RT: 0.01 AV: 1 NL: 4.17E8  
T: FTMS + p ESI Full ms [200.00-800.00]

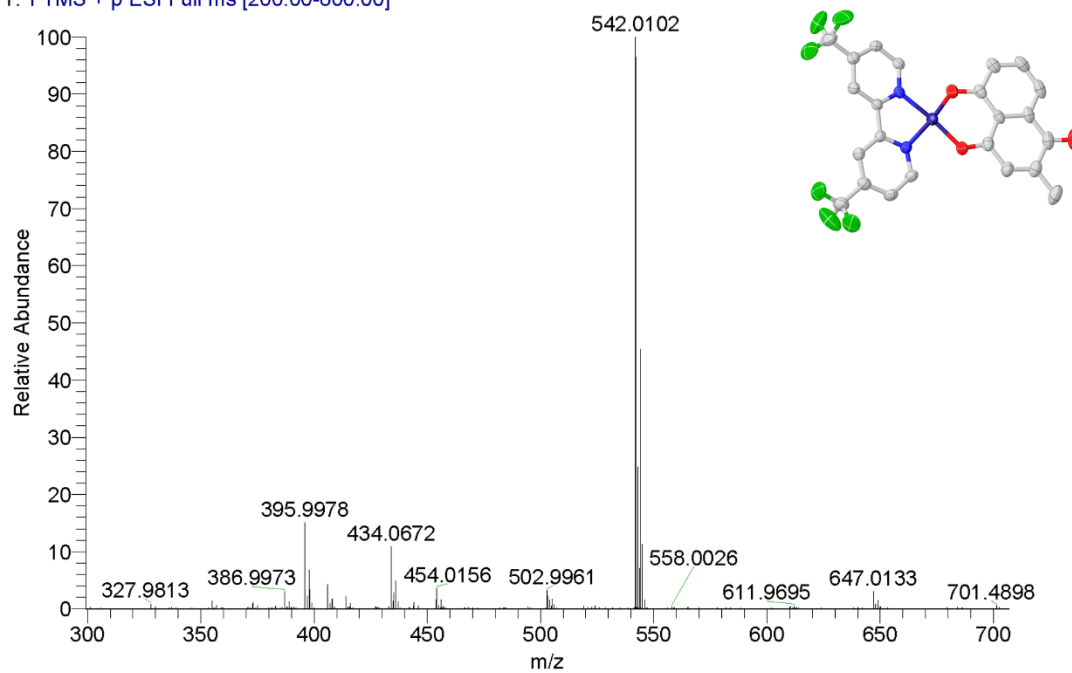

Figure S3. HRMS spectrum of **Cu3**.

N\_220726113050 #1 RT: 0.01 AV: 1 NL: 7.76E7  
T: FTMS + p ESI Full ms [200.00-800.00]

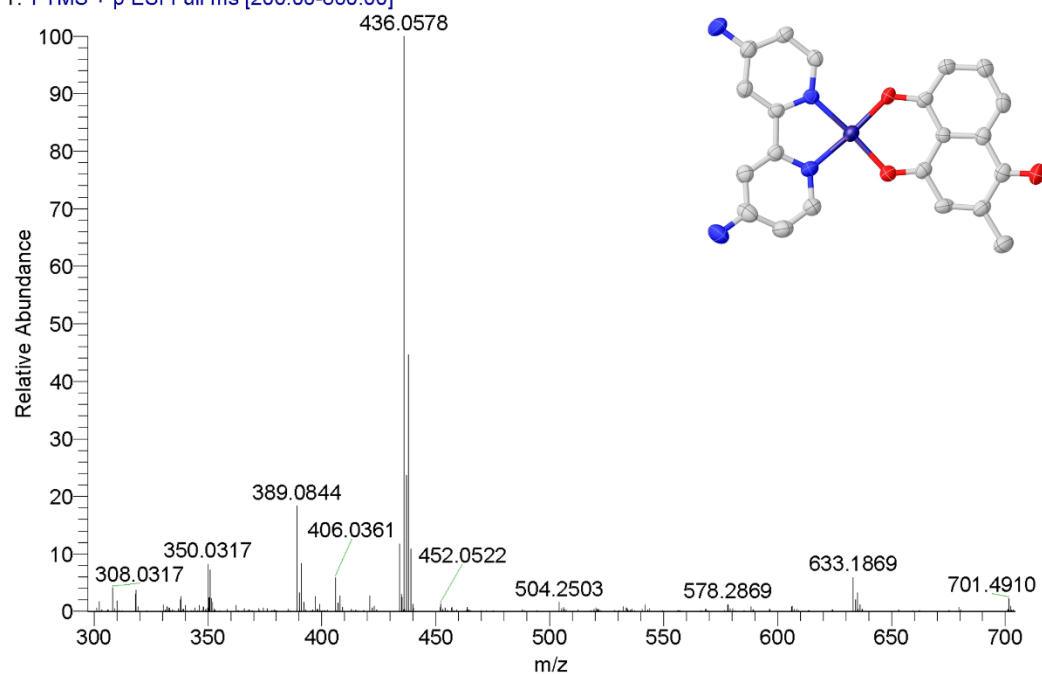

Figure S4. HRMS spectrum of **Cu4**.

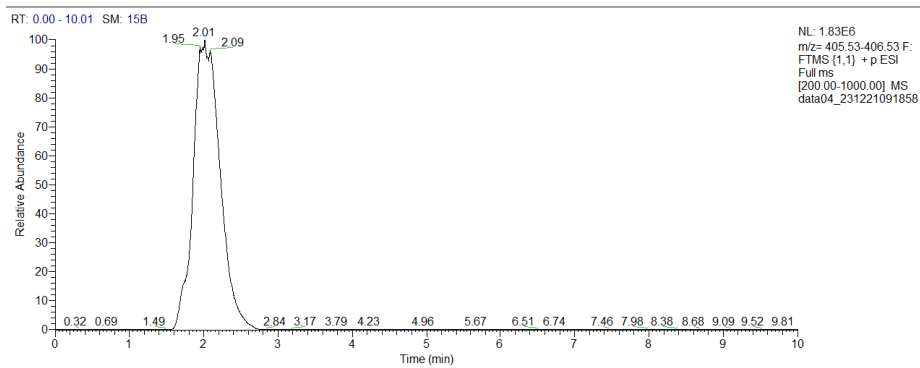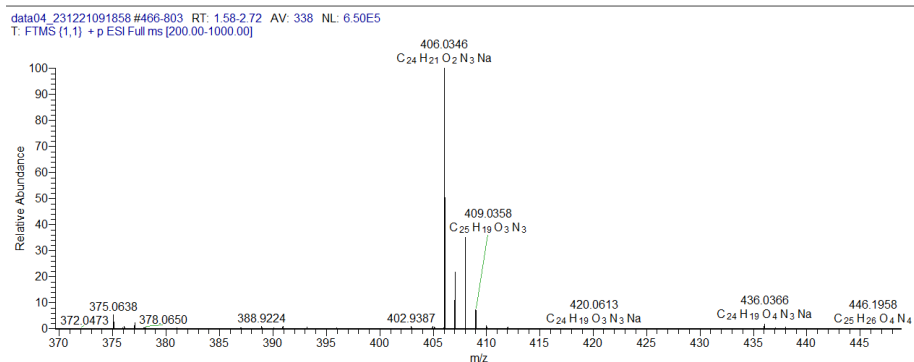

Figure S5. LC-MS spectrum of Cu1.

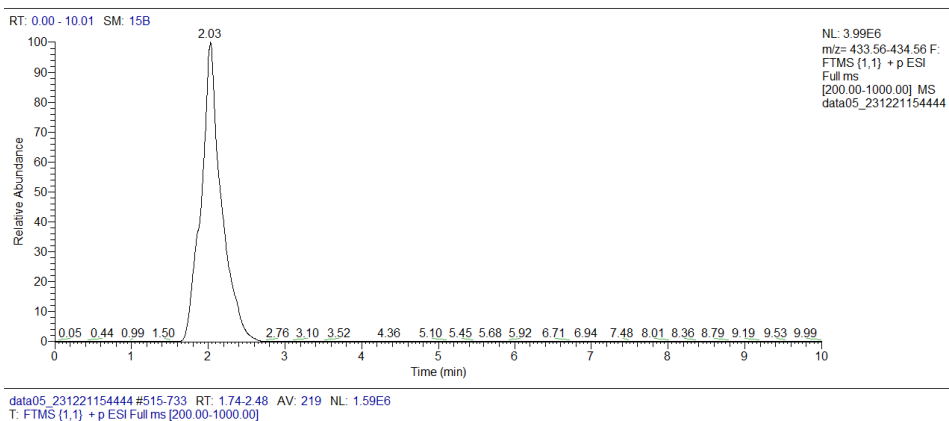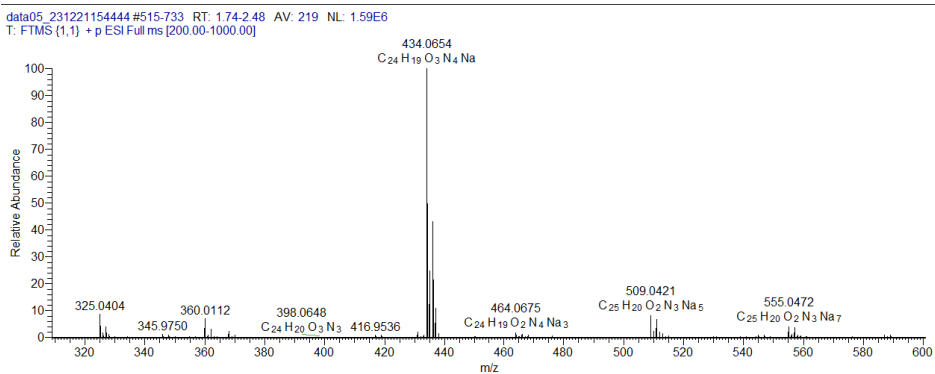

Figure S6. LC-MS spectrum of Cu2.

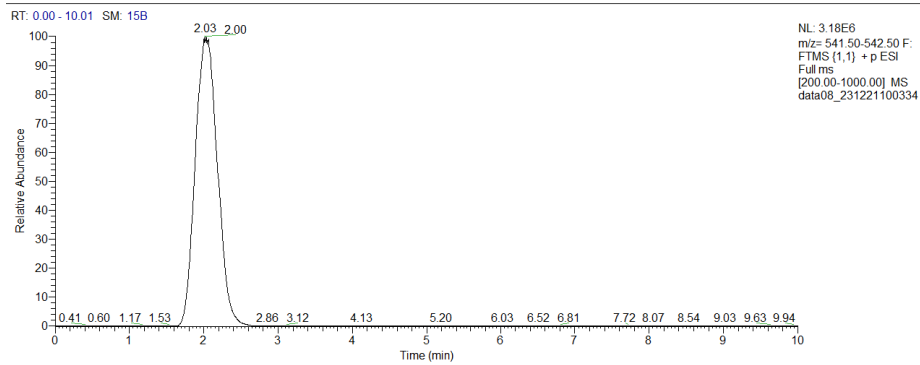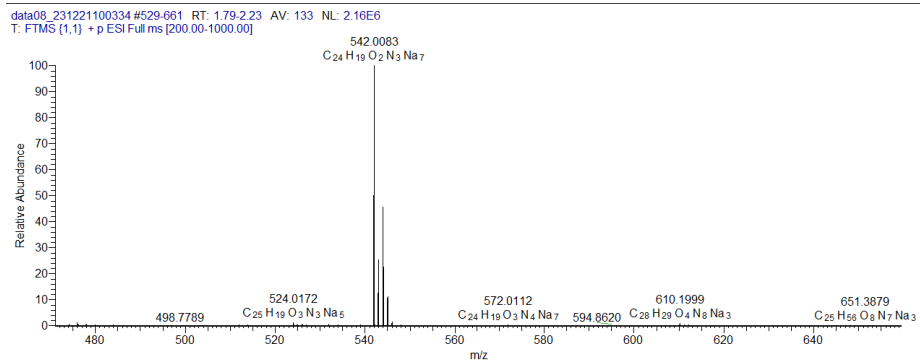

Figure S7. LC-MS spectrum of Cu3.

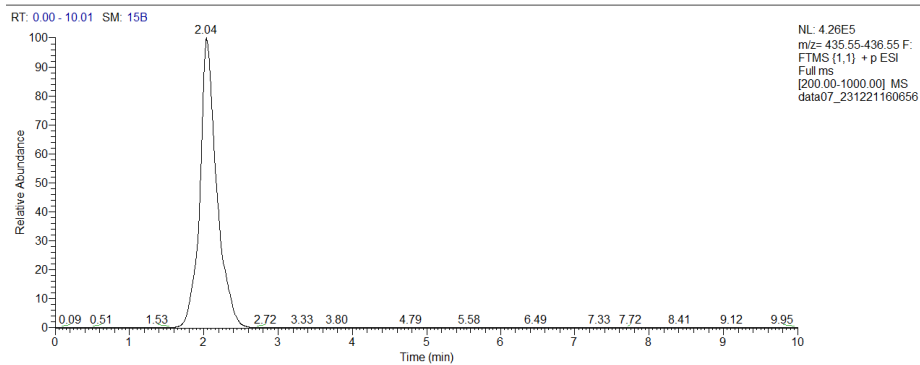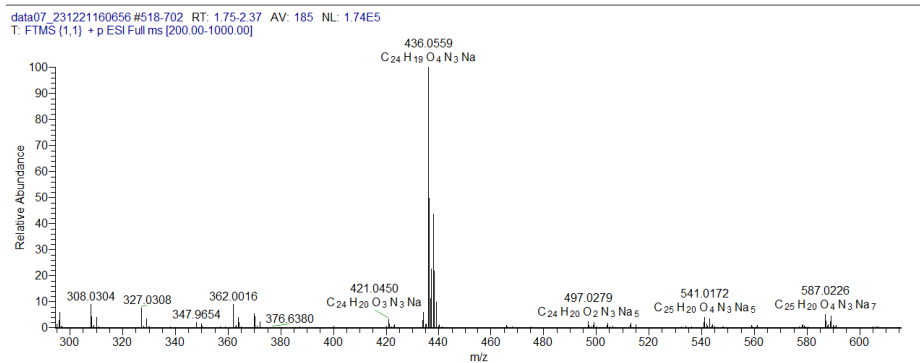

Figure S8. LC-MS spectrum of Cu4.

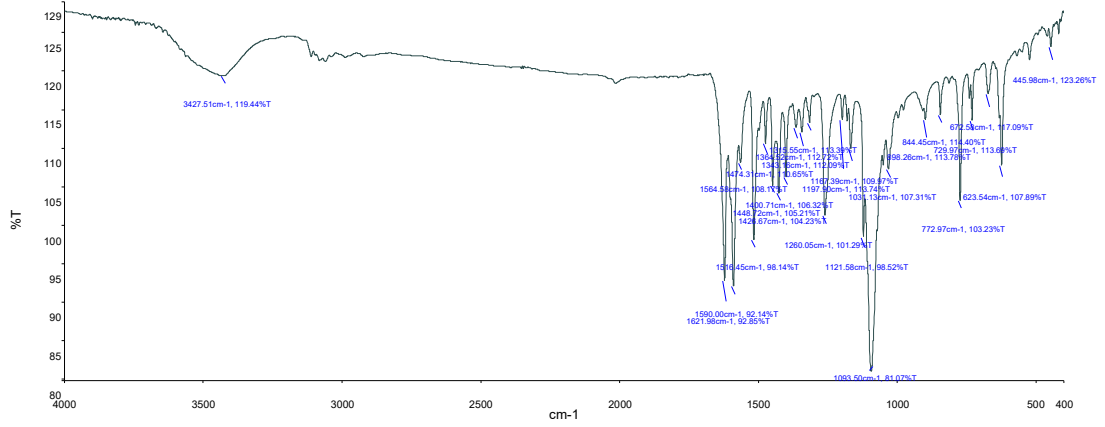

Figure S9. IR spectrum of Cu1.

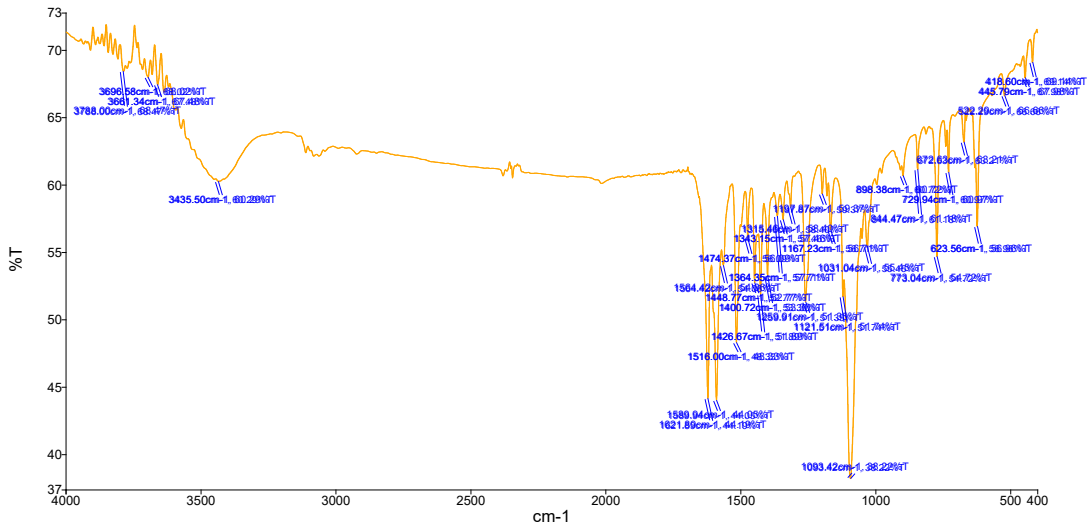

Figure S10. IR spectrum of Cu2.

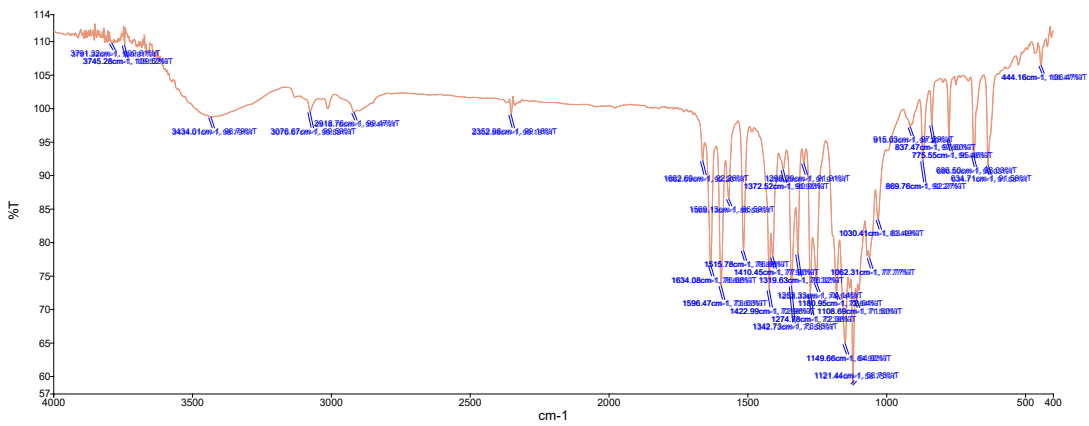

Figure S11. IR spectrum of Cu3.

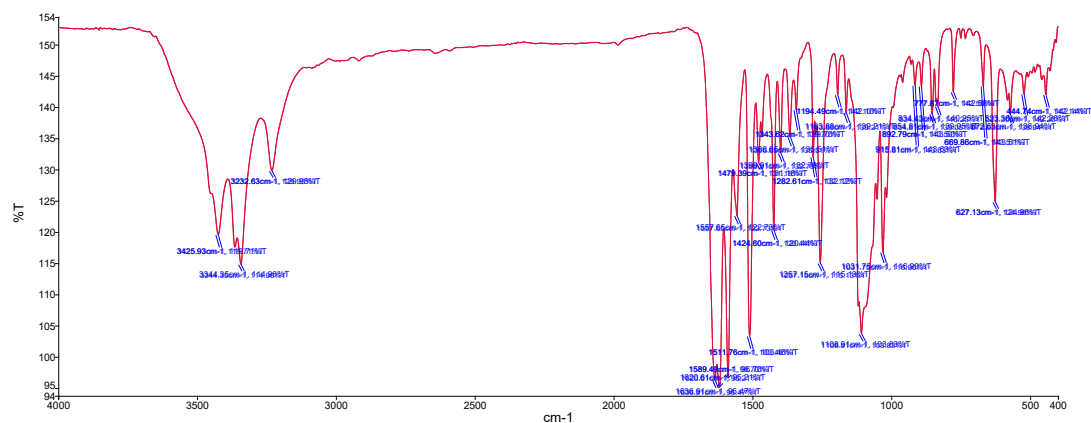

Figure S12. IR spectrum of **Cu4**.

## 2. Stability of Cu1–Cu4 in PBS

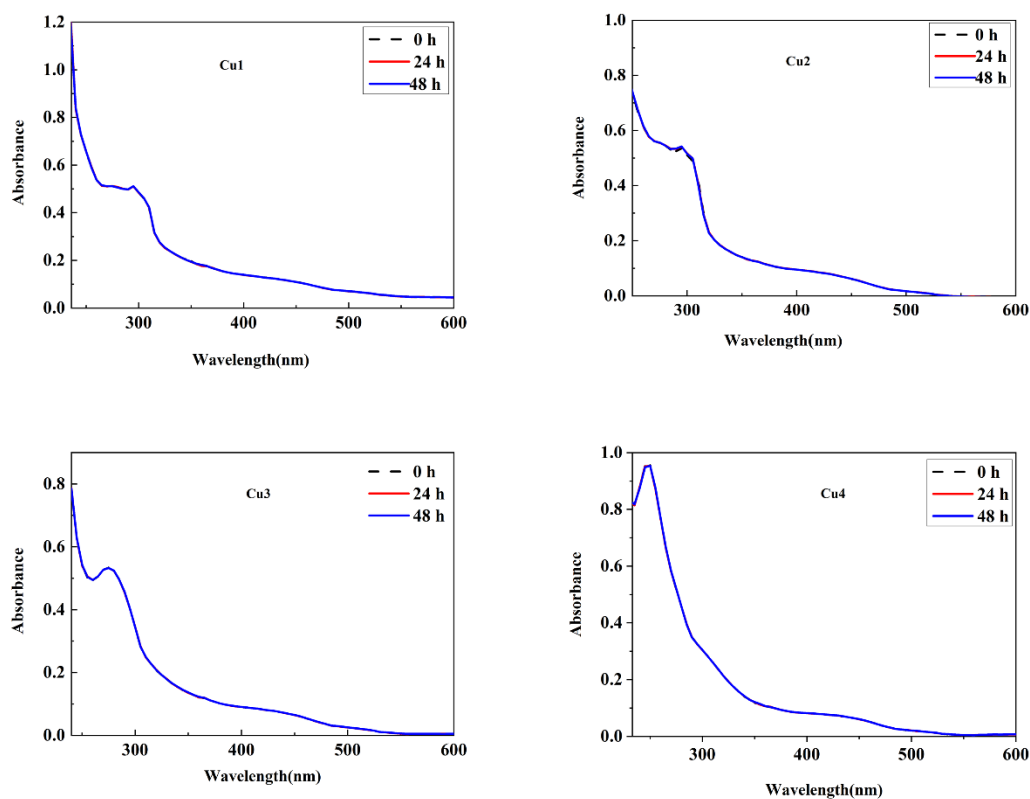

Figure S13. UV-Vis absorption spectra of **Cu1–Cu4** ( $2.0 \times 10^{-3}$  M) in PBS buffer containing 1% DMSO solution in the time course 0 h, 24 h, and 48 h.



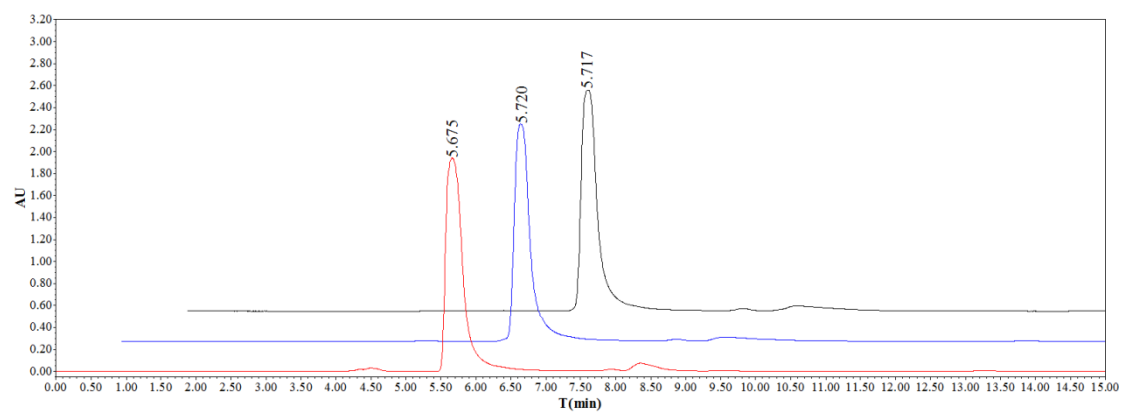

Figure S14. HPLC spectra of **Cu1** ( $2.0 \times 10^{-3}$  M) at time 0 h, 24 h, and 48 h in DMSO/CH<sub>3</sub>OH.

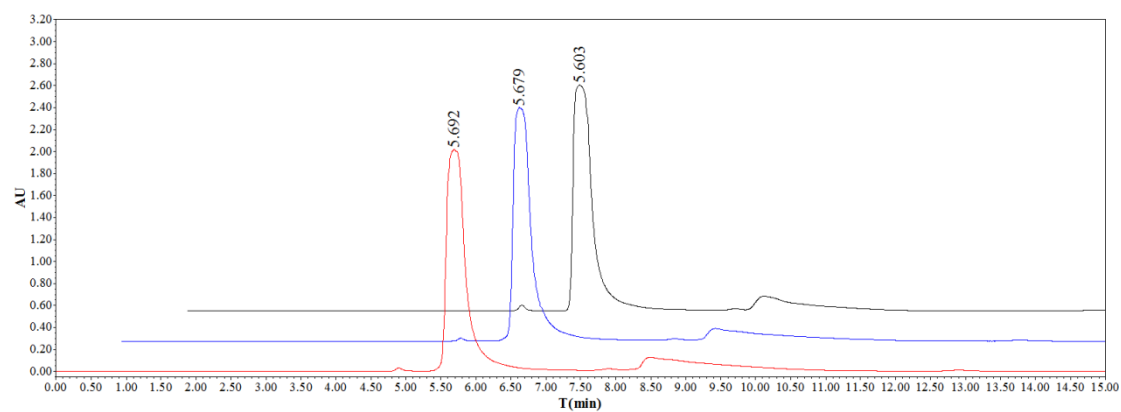

Figure S15. HPLC spectra of **Cu2** ( $2.0 \times 10^{-3}$  M) at time 0 h, 24 h, and 48 h in DMSO/CH<sub>3</sub>OH.

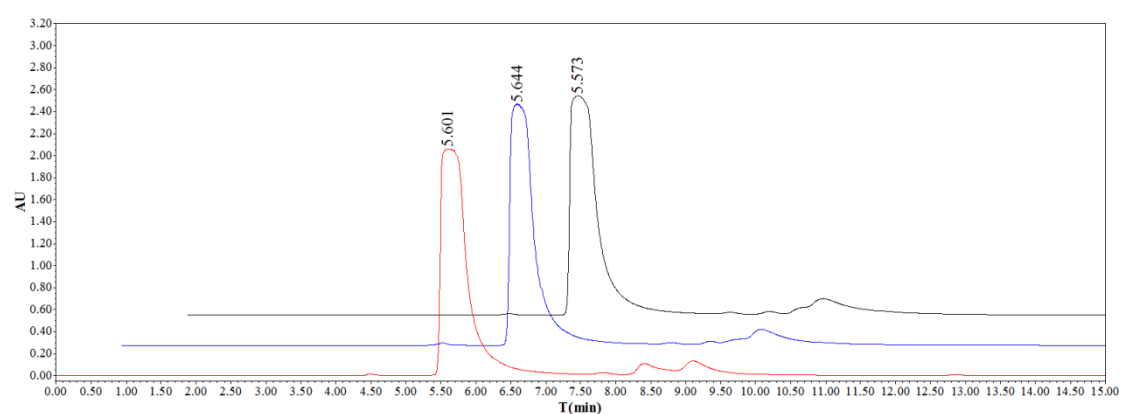

Figure S16. HPLC spectra of **Cu3** ( $2.0 \times 10^{-3}$  M) at time 0 h, 24 h, and 48 h in DMSO/CH<sub>3</sub>OH.

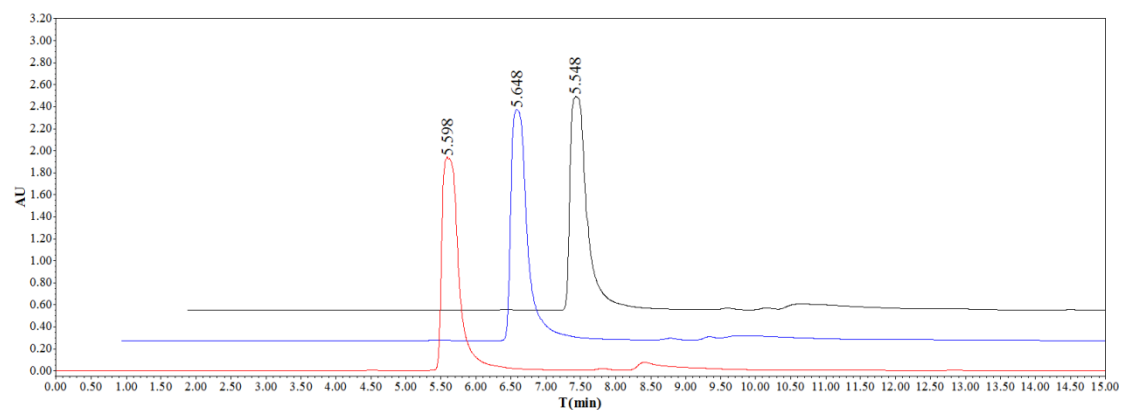

Figure S17. HPLC spectra of **Cu4** ( $2.0 \times 10^{-3}$  M) at time 0, 24 h, and 48 h in DMSO/CH<sub>3</sub>OH.

### 3. Solution behavior of Cu1–Cu4

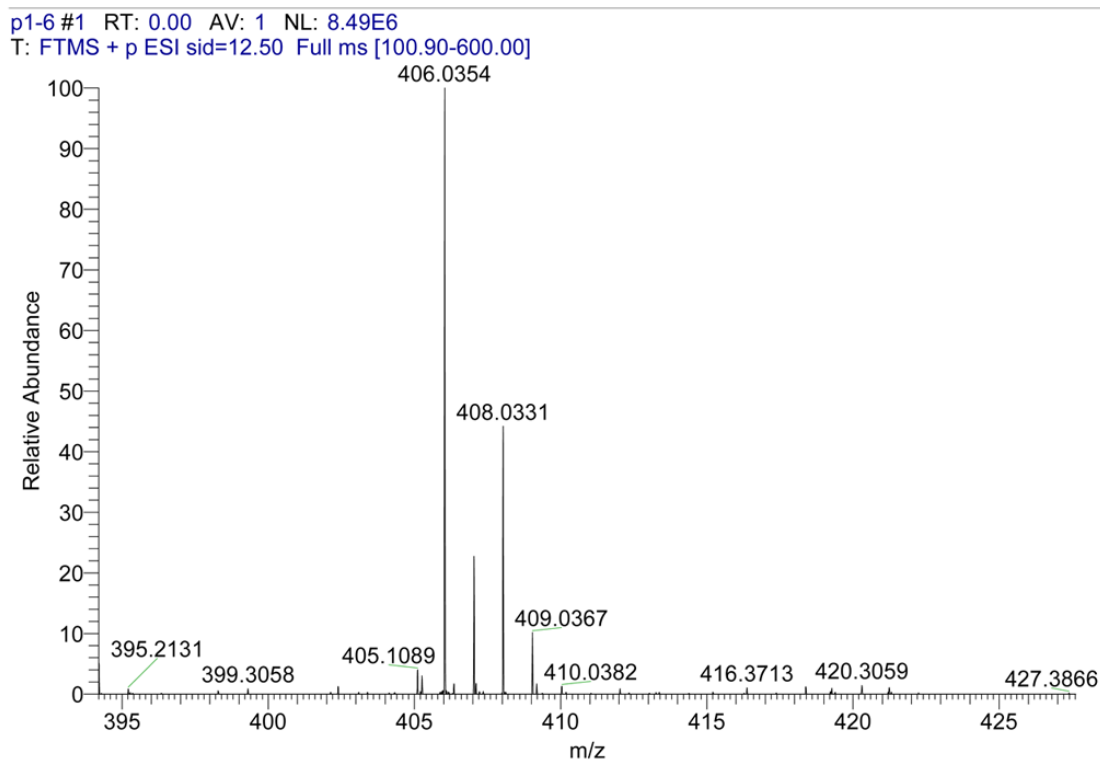

Figure S18. Mass spectrum of **Cu1** in solution.

p2-6 #13-23 RT: 0.05-0.08 AV: 11 NL: 1.64E7  
T: FTMS + p ESI sid=12.50 Full ms [200.90-650.00]

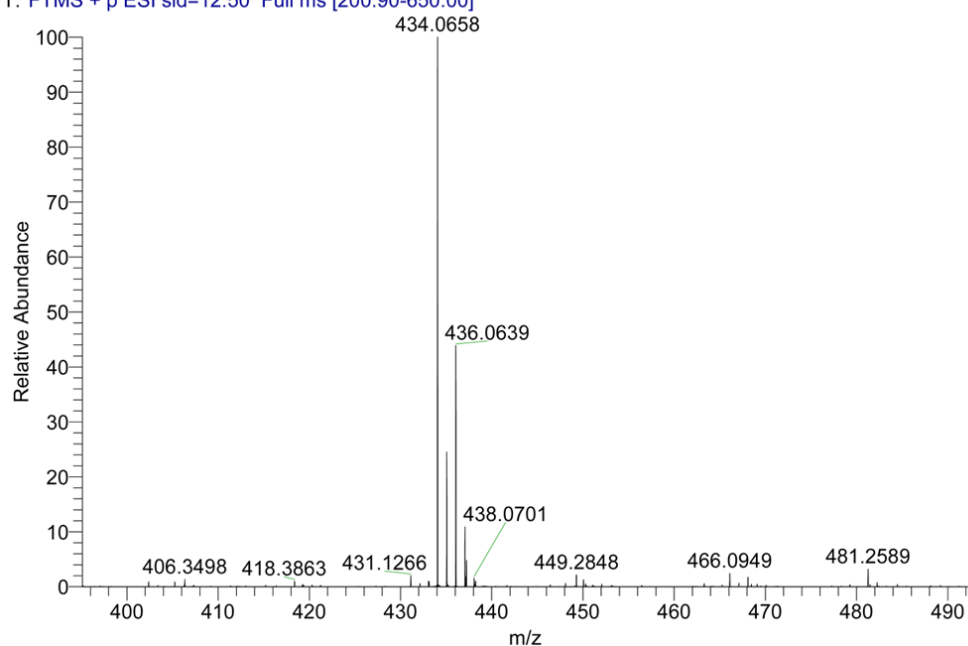

Figure S19. Mass spectrum of **Cu<sub>2</sub>** in solution.

F2-4 #1 RT: -0.00 AV: 1 NL: 3.87E7  
T: FTMS + p ESI sid=12.50 Full ms [300.00-700.00]

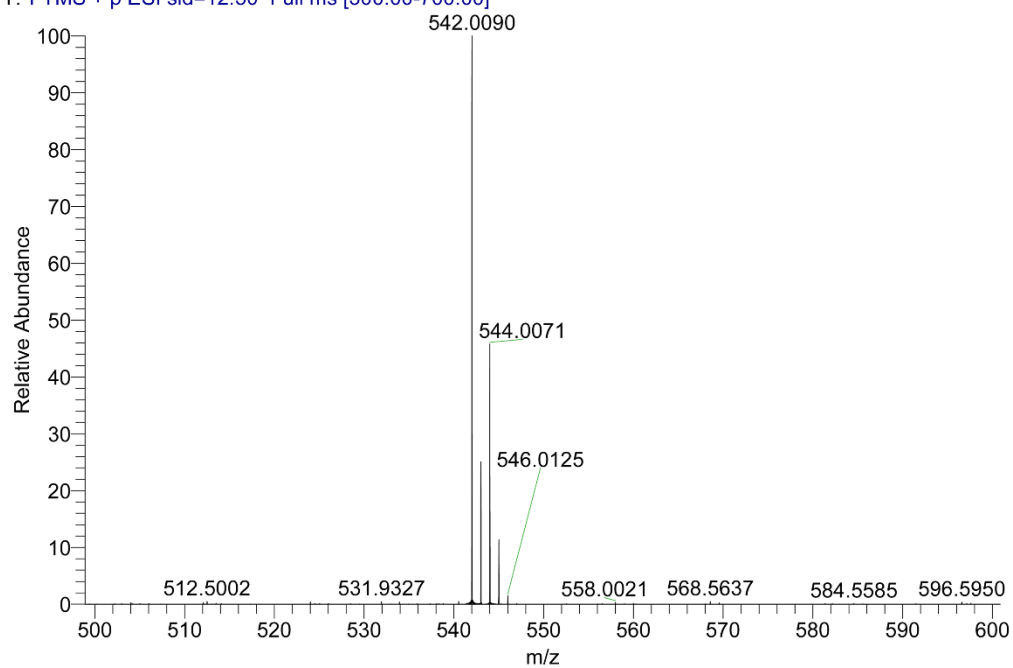

Figure S20. Mass spectrum of **Cu<sub>3</sub>** in solution.

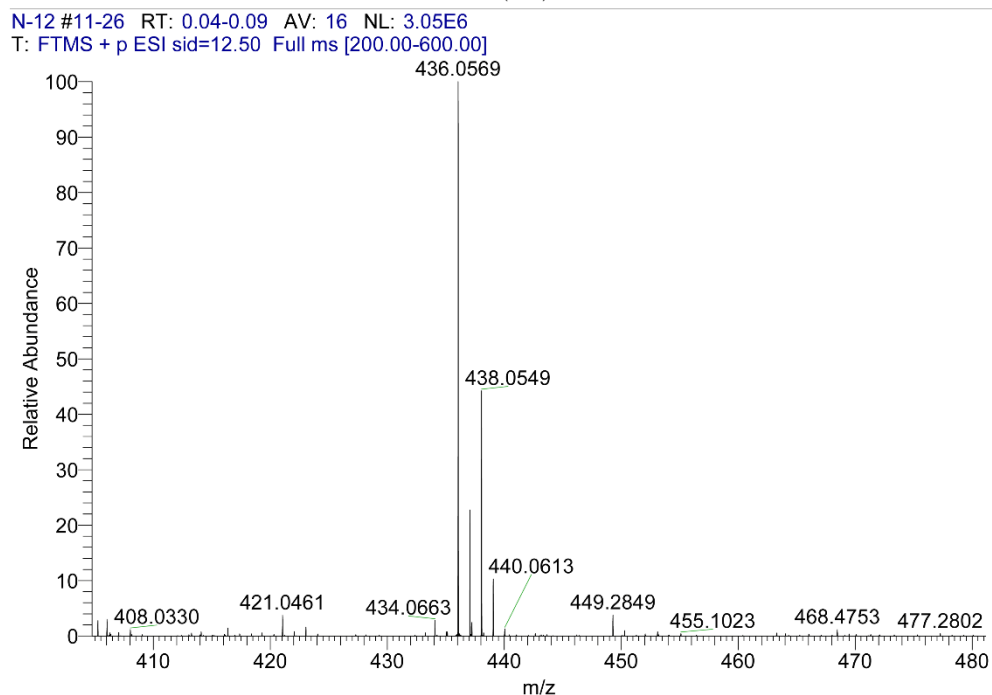

Figure S21. Mass spectrum of **Cu4** in solution.

#### 4. Tables of crystal data of **Cu1–Cu4**

Table S1 Crystal data and structure refinement for **Cu1**

| Complex                     | <b>Cu1</b>               |
|-----------------------------|--------------------------|
| Empirical formula           | $C_{21}H_{15}ClCuN_2O_7$ |
| Formula weight (M)          | 506.34                   |
| Crystal system              | <i>Triclinic</i>         |
| Space group                 | <i>P</i> -1              |
| <i>a</i> (Å)                | 9.2985(5)                |
| <i>b</i> (Å)                | 10.3543(7)               |
| <i>c</i> (Å)                | 11.9616(7)               |
| $\alpha$ (°)                | 112.775(6)               |
| $\beta$ (°)                 | 107.363(5)               |
| $\gamma$ (°)                | 93.359(5)                |
| <i>V</i> /(Å <sup>3</sup> ) | 993.44(11)               |
| <i>Z</i>                    | 2                        |

|                                                 |                                            |
|-------------------------------------------------|--------------------------------------------|
| $D_c(\text{Mg m}^{-3})$                         | 1.693                                      |
| $F(000)$                                        | 514.0                                      |
| $\theta$ range for data collection ( $^\circ$ ) | 3.4–26.3 $^\circ$                          |
| Reflections collected / unique                  | 12106/4043 [ $R_{(\text{int})} = 0.0417$ ] |
| Goodness-of-fit on $F^2$                        | 1.049                                      |
| $R$ indices [ $I > 2\sigma(I)$ ]                | $R_1 = 0.0527$ $\omega R_2 = 0.1248$       |
| $R$ indices (all data)                          | $R_1 = 0.0791$ $\omega R_2 = 0.1451$       |

Table S2 Crystal data and structure refinement for **Cu2**

| Complex                                         | <b>Cu2</b>                                           |
|-------------------------------------------------|------------------------------------------------------|
| Empirical formula                               | $\text{C}_{23}\text{H}_{19}\text{ClCuN}_2\text{O}_7$ |
| Formula weight (M)                              | 534.39                                               |
| Crystal system                                  | <i>Monoclinic</i>                                    |
| Space group                                     | $P2_1/n$                                             |
| $a$ ( $\text{\AA}$ )                            | 9.3791(2)                                            |
| $b$ ( $\text{\AA}$ )                            | 10.6291(2)                                           |
| $c$ ( $\text{\AA}$ )                            | 22.1108(4)                                           |
| $\alpha$ ( $^\circ$ )                           | 90                                                   |
| $\beta$ ( $^\circ$ )                            | 92.1043(17)                                          |
| $\gamma$ ( $^\circ$ )                           | 90                                                   |
| $V$ ( $\text{\AA}^3$ )                          | 2202.78(8)                                           |
| $Z$                                             | 4                                                    |
| $D_c(\text{Mg m}^{-3})$                         | 1.611                                                |
| $F(000)$                                        | 1092.0                                               |
| $\theta$ range for data collection ( $^\circ$ ) | 3.4–26.3 $^\circ$                                    |
| Reflections collected / unique                  | 13491/4498 [ $R_{(\text{int})} = 0.0257$ ]           |
| Goodness-of-fit on $F^2$                        | 1.040                                                |
| $R$ indices [ $I > 2\sigma(I)$ ]                | $R_1 = 0.0369$ $\omega R_2 = 0.0922$                 |
| $R$ indices (all data)                          | $R_1 = 0.0453$ $\omega R_2 = 0.0985$                 |

Table S3 Crystal data and structure refinement for **Cu3**

| Complex                                       | <b>Cu3</b>                                                                       |
|-----------------------------------------------|----------------------------------------------------------------------------------|
| Empirical formula                             | C <sub>23</sub> H <sub>13</sub> ClCuF <sub>6</sub> N <sub>2</sub> O <sub>7</sub> |
| Formula weight (M)                            | 642.34                                                                           |
| Crystal system                                | <i>monoclinic</i>                                                                |
| Space group                                   | <i>P2<sub>1</sub>/c</i>                                                          |
| <i>a</i> (Å)                                  | 9.5260(4)                                                                        |
| <i>b</i> (Å)                                  | 16.5988(5)                                                                       |
| <i>c</i> (Å)                                  | 15.9965(5)                                                                       |
| $\alpha$ (°)                                  | 90                                                                               |
| $\beta$ (°)                                   | 105.658(4)                                                                       |
| $\gamma$ (°)                                  | 90                                                                               |
| <i>V</i> /(Å <sup>3</sup> )                   | 2435.50(15)                                                                      |
| <i>Z</i>                                      | 4                                                                                |
| <i>D<sub>c</sub></i> (Mg m <sup>-3</sup> )    | 1.752                                                                            |
| <i>F</i> (000)                                | 1284.0                                                                           |
| $\theta$ range for data collection (°)        | 3.3–28.8°                                                                        |
| Reflections collected / unique                | 16165/5645 [ <i>R</i> <sub>(int)</sub> = 0.0429]                                 |
| Goodness-of-fit on <i>F</i> <sup>2</sup>      | 1.060                                                                            |
| <i>R</i> indices [ <i>I</i> > 2σ( <i>I</i> )] | <i>R</i> <sub>1</sub> = 0.0612 ω <i>R</i> <sub>2</sub> = 0.1314                  |
| <i>R</i> indices (all data)                   | <i>R</i> <sub>1</sub> = 0.1023 ω <i>R</i> <sub>2</sub> = 0.1518                  |

Table S4 Crystal data and structure refinement for **Cu4**

| Complex                                       | <b>Cu4</b>                                                        |
|-----------------------------------------------|-------------------------------------------------------------------|
| Empirical formula                             | C <sub>21</sub> H <sub>17</sub> ClCuN <sub>4</sub> O <sub>7</sub> |
| Formula weight (M)                            | 536.38                                                            |
| Crystal system                                | <i>triclinic</i>                                                  |
| Space group                                   | <i>P</i> -1                                                       |
| <i>a</i> (Å)                                  | 9.4798(5)                                                         |
| <i>b</i> (Å)                                  | 10.4607(8)                                                        |
| <i>c</i> (Å)                                  | 12.3592(8)                                                        |
| $\alpha$ (°)                                  | 109.072(7)                                                        |
| $\beta$ (°)                                   | 110.542(6)                                                        |
| $\gamma$ (°)                                  | 90.238(5)                                                         |
| <i>V</i> /(Å <sup>3</sup> )                   | 1074.86(14)                                                       |
| <i>Z</i>                                      | 2                                                                 |
| <i>D<sub>c</sub></i> (Mg m <sup>-3</sup> )    | 1.657                                                             |
| <i>F</i> (000)                                | 564.0                                                             |
| $\theta$ range for data collection (°)        | 3.2–28.8°                                                         |
| Reflections collected / unique                | 16062/5050 [ <i>R</i> <sub>(int)</sub> = 0.0872]                  |
| Goodness-of-fit on <i>F</i> <sup>2</sup>      | 1.001                                                             |
| <i>R</i> indices [ <i>I</i> > 2σ( <i>I</i> )] | <i>R</i> <sub>1</sub> = 0.0708 ω <i>R</i> <sub>2</sub> = 0.1518   |
| <i>R</i> indices (all data)                   | <i>R</i> <sub>1</sub> = 0.1551 ω <i>R</i> <sub>2</sub> = 0.1959   |

## 5. The HRMS spectra of Cu1–Cu4 reacted with GSH, separately

Cu1 GSH#1 RT: 0.00 AV: 1 NL: 1.09E5  
T: FTMS - p ESI Full ms [100.00-800.00]

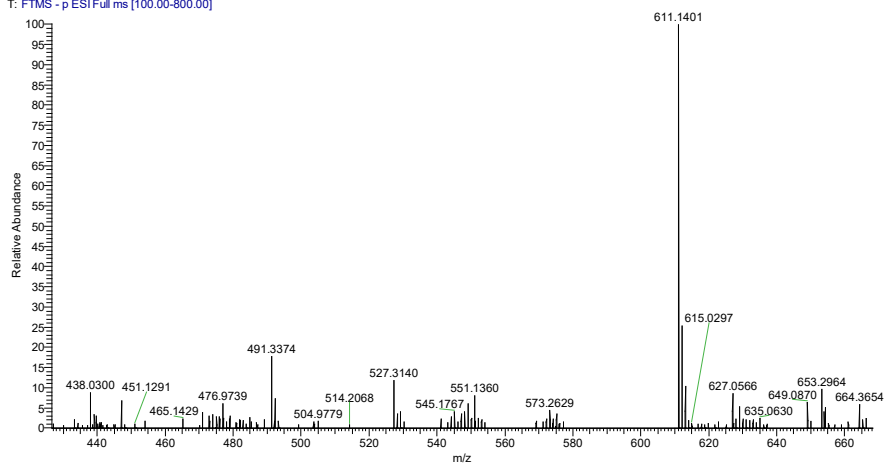

Figure S22. HRMS spectrum of Cu1 with GSH.

Cu2 GSH#1 RT: 0.00 AV: 1 NL: 1.40E5  
T: FTMS - p ESI Full ms [100.00-800.00]

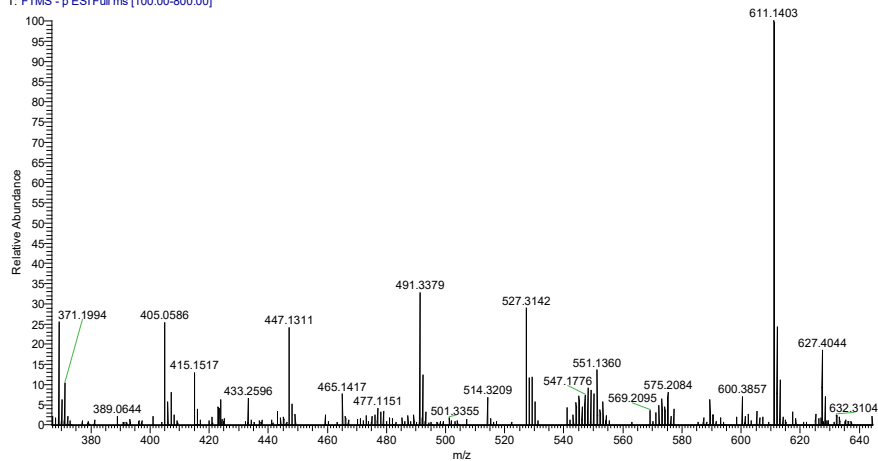

Figure S23. HRMS spectrum of Cu2 with GSH.

Cu3 GSH#6 RT: 0.00 AV: 1 NL: 1.07E4  
T: FTMS - p ESI Full ms [100.00-800.00]

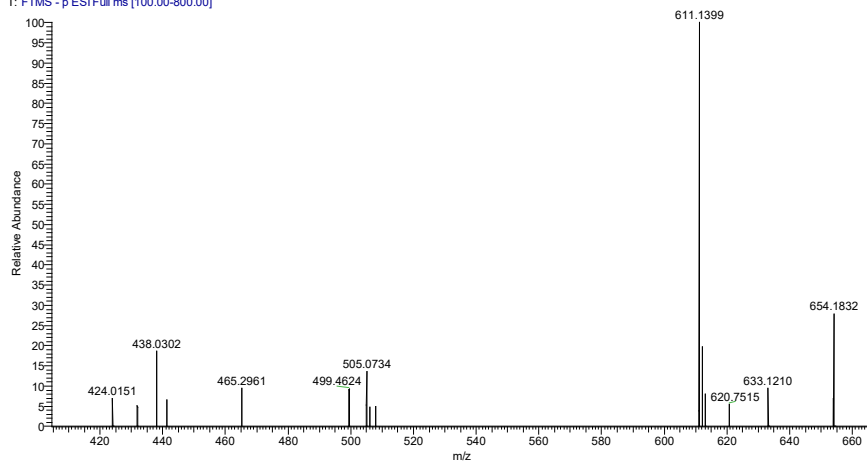

Figure S24. HRMS spectrum of Cu3 with GSH.



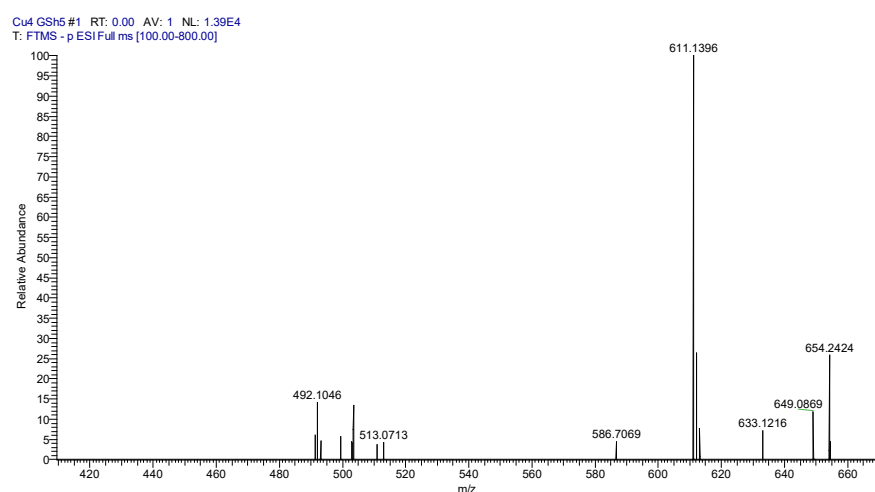

Figure S25. HRMS spectrum of Cu4 with GSH.

## 6. Intracellular GSH / GSSG ratio

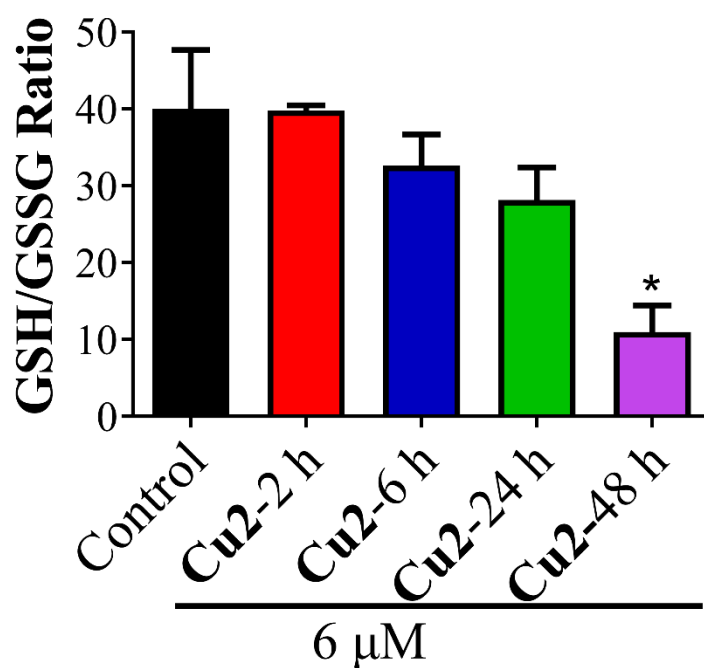

Figure S26. GSH/GSSG ratios in HeLa cells after 2 h, 6 h, 24 h and 48 h of exposure to Cu2 (6 μM, \*P < 0.05, \*\* P < 0.01, \*\*\* P < 0.001) .

## 7. Cell cycle arrest of Cu1–Cu4

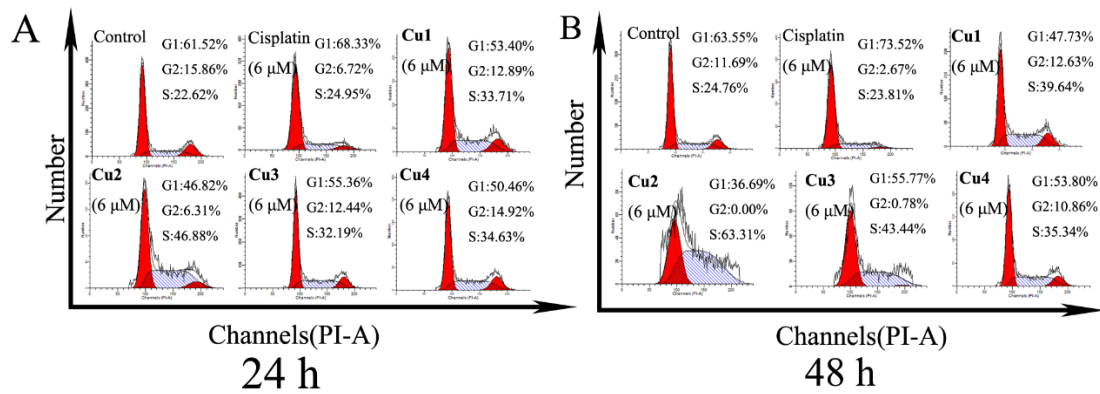

Figure S27. (A)(B) Cell cycle analysis of HeLa cells that treated with **Cu1–Cu4** (6  $\mu$ M) and cisplatin (6  $\mu$ M) for 24 and 48 h.

## 8. Expression of apoptosis-related proteins induced by Cu1-Cu4

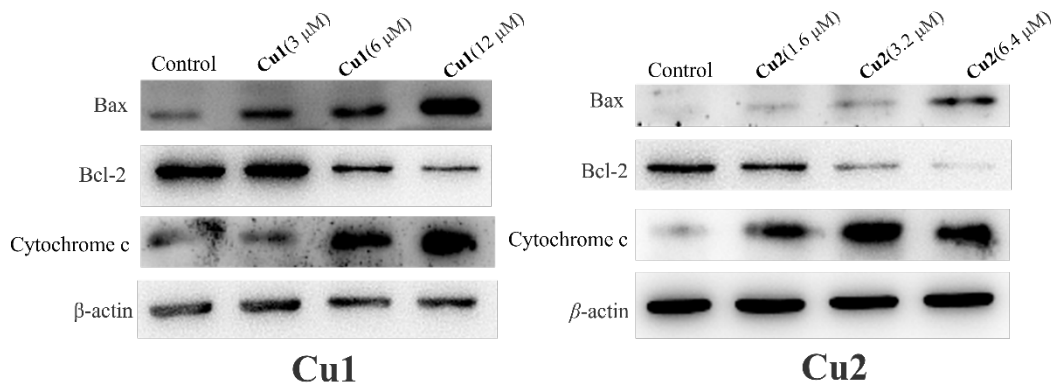

Figure S28. The expression level of apoptosis related proteins following **Cu1** and **Cu2** after exposure to 0.5x  $IC_{50}$ , 1x  $IC_{50}$ , and 2x  $IC_{50}$ .

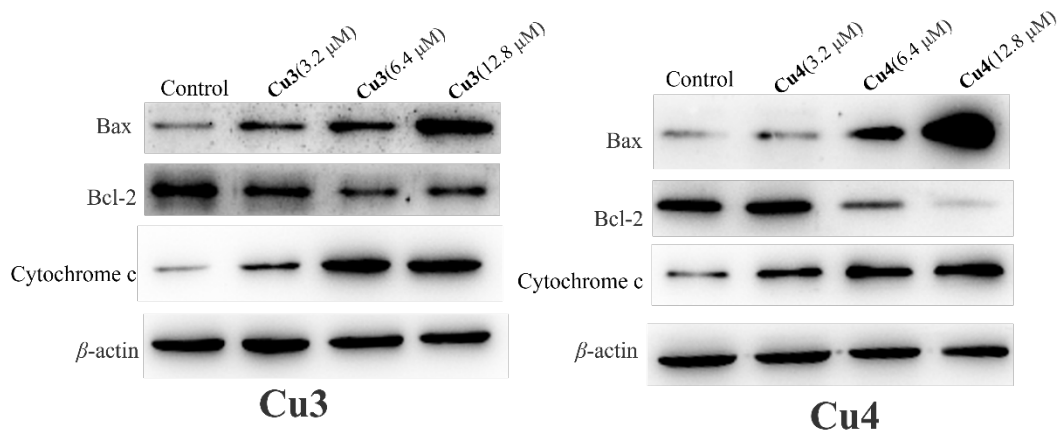

Figure S29. The expression level of apoptosis related proteins following **Cu3** and **Cu4** after exposure to 0.5x  $IC_{50}$ , 1x  $IC_{50}$ , and 2x  $IC_{50}$ .

## 9. pharmacokinetic evaluation of Cu2

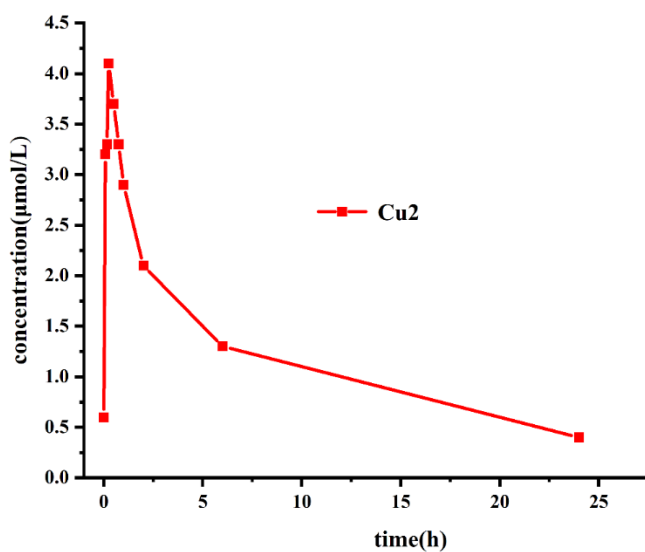

Figure S30. Pharmacokinetic evaluation in mice: concentration-time profile of **Cu2** in plasma following a single dose (20 mg/kg)

## 10. Acute toxicity test of Cu2

Table S5 acute toxicity of **Cu2** (alive/total)

|            |             |              |             |
|------------|-------------|--------------|-------------|
|            | 18.18 mg/kg | 22.725 mg/kg | 27.27 mg/kg |
| <b>Cu2</b> | 6/6         | 6/6          | 4/6         |
